# Supplementary material for: FASTKD1 and FASTKD4 have opposite effects on expression of specific mitochondrial RNAs, depending upon their endonuclease-like RAP domain
Source: PubMed Central journal article supplement — Nucleic Acids Res. 2017 Mar 10;45(10):6135–46. doi: 10.1093/nar/gkx164 (PMC5449608; doi:10.1093/nar/gkx164), 2017-03-10
Supplement: gkx164_Supp.pdf [file gkx164_Supp.pdf]

## Supplementary Information

Figure S1. Generation of FASTKD1 and FASTKD4 knockout cells.

A) left panel: Schematic of the PCR and restriction digest screen showing expected results for amplification of clones with: wild type sequences (WT), heterozygous deletions (-/+), homozygous deletions (-/-), and uncut sequences (-BstNI). Panel 2nd from the Right: example results obtained for an anti-FASTKD4 CRISPR/Cas9 construct treated clone (D4 CRISPR) compared to an untreated clone (WT). Right panel: example results obtained from bulk cells treated with an anti-FASTKD1 CRISPR/Cas9 construct (D1 CRISPR) or bulk wild type cells (WT). Lower panels: example screening of clones for candidate FASTKD1 or FASTKD4 knockout cell lines. Lanes corresponding to candidate cell lines are marked with an asterisk. The high cutting rate in the D1 screen is because it is a re-screen of candidates from a previous screen.

B) Confirmation of FASTKD4 knockouts by western blot with anti-FASTKD4 antibody. Left panel: Western blot of a HEK knockout cell line (HEK D4KO), compared to untreated HEK cells (HEK WT) with a marker lane in between. Top: anti-FASTKD4 signal. Bottom: anti-TOM20 signal on the same membrane as a loading control, with weak FASTKD4 signal still present. Right panel: a western blot as in the left panel using 143B cells. Multiple knockout cell lines (143B D4-KO), compared to untreated 143B cells (143B-WT).

C) Example sequencing results of a FASTKD4 KO cell. In this specific case the cell screened as heterozygous for a deletion in the FASTKD4 that was amplified. An allele with a 1 base pair insertion was detected. Genomic DNA was amplified by PCR, and then cloned into a vector and transformed into bacteria. Individual colonies were selected and the vector insert was sequenced to determine the sequence change. 8 colonies were selected for each clone to ensure every allele was sequenced. As expected, the mutations were always detected 3 base pairs upstream of the PAM motif where CRISPR/Cas9 is known to cut. The restriction site used in the PCR and restriction digest screen is indicated; note that the screen is leaky and only detects deletion mutations and not insertions.

Figure S2. A) Chimeric FASTK proteins do not rescue FASTK loss. Northern blot with <sup>32</sup>P labelled antisense ND6 and 7SL RNA probes. Equal amounts of total RNA from the indicated cells were loaded for analysis.

B) Immunofluorescence of the D0-D4<sup>RAP</sup> chimeras. Top right panel: anti-FASTKD2 in green, Lower right panel anti-HA in red. HA tagged D0-D4<sup>RAP</sup> still localizes to RNA granules.

C) Northern blot analysis with anti-ND5 or anti-CYB probes labeling ND5/CYB and precursor ND5-CYB. Anti-7SL probes were used for loading controls. Stability was assessed by transcriptional blockage with EtBr for the indicated times.

Supplementary Table 1. Plasmids, Primers, and antibodies.

**Riboprobes**

| <b>Name</b>       | <b>Forward primer</b>                                                                                      | <b>Species</b> |
|-------------------|------------------------------------------------------------------------------------------------------------|----------------|
| 12S               | ACTCAAAGGACCTGGCGGTGC                                                                                      | Human          |
| 16S               | CCGTGAAGAGGCGGGCATAACAC                                                                                    | Human          |
| MTND1             | CTACGCCCTGATCGGCGCAC                                                                                       | Human          |
| MTND2             | CACCCCTCTGACATCCGGCCT                                                                                      | Human          |
| MTND3             | CCACCCCTTACGAGTGCGGC                                                                                       | Human          |
| MTND4/4L          | AAGCCCCATCGCTGGGTCA                                                                                        | Human          |
| MTND5             | ACGCCCGAGCAGATGCCAAC                                                                                       | Human          |
| MTND6 full-length | CGGTAATACGACTCACTATAGGGAGAcaccctaacaggtaaacctcCGGTAATACGACTCACTATAGGGAGAcaccctaacaggtaaacctc               | Human          |
| MTND6 CDS         | CGG TAA TAC GAC TCA CTA TAG GGA GAC<br>GAA TCA ACC CTG ACC CCT C                                           | Human          |
| MTND6 UTR         | CGGTAATACGACTCACTATAGGGAGA<br>GCTACCTCCCTGACAAGCGCCCGGTAATACG<br>ACTCACTATAGGGAGA<br>GCTACCTCCCTGACAAGCGCC | Human          |
| MTCYB             | CTCACTCCTTGGCGCCTGCC                                                                                       | Human          |
| MTCO1             | TGGAGGCCGGAGCAGGAACA                                                                                       | Human          |
| MTCO2             | CGCCCTCCCATCCCTACGCA                                                                                       | Human          |
| MTCO3             | GGCCCCAACAGGCATCACC                                                                                        | Human          |
| MTATP8/6          | TGGCCCACCATAATTACCCCA                                                                                      | Human          |
| tRNA(Phe)         | GTTTATGTAGCTTACCTCC                                                                                        | Human          |
| tRNA(Glu)         | GTT CTT GTA GTT GAA ATA C                                                                                  | Human          |
| tRNA(LeuUUA/G)    | GTTAAGATGGCAGAGCCCGG                                                                                       | Human          |
| tRNA(Pro)         | CGGTAATACGACTCACTATAGGGAGATCAGA<br>GAAAAAGTC                                                               | Human          |
| Tubulin           | CGCGAAGCAGCAACCATGCG                                                                                       | Human          |
| 7SL               | gccgggcgcggtggcgcggtg                                                                                      | Human          |

**Riboprobes**

| <b>Name</b>       | <b>Reverse primer</b>                                    | <b>Species</b> |
|-------------------|----------------------------------------------------------|----------------|
| 12S               | CGGTAATACGACTCACTATAGGGAGA<br>GGTGACGGGCGGTGTGTACG       | Human          |
| 16S               | CGGTAATACGACTCACTATAGGGAGAATCCA<br>ACATCGAGGTCGTAAACCCT  | Human          |
| MTND1             | CGGTAATACGACTCACTATAGGGAGA<br>GGTCGTAGCGGAATCGGGGG       | Human          |
| MTND2             | CGGTAATACGACTCACTATAGGGAGA<br>GGCCTCCTAGGGAGAGGAGGGT     | Human          |
| MTND3             | CGGTAATACGACTCACTATAGGGAGA<br>AGGCCAGACTTAGGGCTAGGATGA   | Human          |
| MTND4/4L          | CGGTAATACGACTCACTATAGGGAGA<br>GGATGTAAGCCCGTGGGCGA       | Human          |
| MTND5             | CGGTAATACGACTCACTATAGGGAGA<br>GGCGCAGACTGCTGCCAACA       | Human          |
| MTND6 full-length | ATG ATG TAT GCT TTG TTT CTG                              | Human          |
| MTND6 CDS         | GAT TGT TAG CGG TGT GGT CG                               | Human          |
| MTND6 UTR         | AGGGGCAGGTTTTGGCTCGT                                     | Human          |
| MTCYB             | CGGTAATACGACTCACTATAGGGAGAGCCTC<br>ACGGGAGGACATAGCC      | Human          |
| MTCO1             | CGGTAATACGACTCACTATAGGGAGACGGCG<br>GGGTCSAAGAAGGTG       | Human          |
| MTCO2             | CGGTAATACGACTCACTATAGGGAGA<br>TACCCCGGTCGTGTAGCGG        | Human          |
| MTCO3             | CGGTAATACGACTCACTATAGGGAGA<br>ATGCCAGTATCAGGCGGCGG       | Human          |
| MTATP8/6          | CGGTAATACGACTCACTATAGGGAGA<br>GGGGGCAATGAATGAAGCGAACAG   | Human          |
| tRNA(Phe)         | CGGTAATACGACTCACTATAGGGAGATGT<br>TTA TGG GGT GAT GTG AG  | Human          |
| tRNA(Glu)         | CGGTAATACGACTCACTATAGGGAGATAT<br>TCT CGC ACG GAC TAC     | Human          |
| tRNA(LeuUUA/G)    | CGGTAATACGACTCACTATAGGGAGATGT<br>TAA GAA GAG GAA TTG AAC | Human          |
| tRNA(Pro)         | CAG AGA ATA GTT TAA ATT AG                               | Human          |
| Tubulin           | CGGTAATACGACTCACTATAGGGAGATGGTC<br>GGCCAGCTTGCGAAT       | Human          |
| 7SL               | CGGTAATACGACTCACTATAGGGAGA AGA<br>GAC GGG GTC TCG CTA TG | Human          |

**shRNAs**

| <b>Name</b>    | <b>Reference</b>          | <b>Source</b> |
|----------------|---------------------------|---------------|
| pLKO.1 shFASTK | Jourdain et. al. 2015 (9) | Sigma         |

**Antibodies**

| <b>Name</b>       | <b>Reference</b> | <b>Source</b>            |
|-------------------|------------------|--------------------------|
| FASTKD2           | 17464-1AP        | Proteintech              |
| FASTKD4           | sc-373752        | Santa Cruz Biotechnology |
| FLAG (monoclonal) | F3165            | Sigma                    |
| FLAG (polyclonal) | F7425            | Sigma                    |
| HA (monoclonal)   | CO-MMS-101P-500  | Covence                  |
| HA (polyclonal)   | Ab9110           | Abcam                    |
| Tom20             | FL-145           | Santa Cruz Biotechnology |

**Plasmids and primers**

| <b>Name</b>                | <b>Forward primer/Plasmid Description</b>                                       | <b>cDNA source/Use</b>                                     |
|----------------------------|---------------------------------------------------------------------------------|------------------------------------------------------------|
| GFP                        | pWPT with GFP insert                                                            | P. Salmon                                                  |
| FASTK isoform 1            | ATC GAT CGA CGC GTA TGA GGA GGC CGC<br>GGG GGG AAC CCG G                        | Biocat                                                     |
| FASTK isoform 4            | ATC GAT CGA CGC GTA TGA GGA GGC CGC<br>GGG GGG AAC CCG G                        | Biocat                                                     |
| mitoFASTK                  | ATCGATCG ACGCGT atg ctg agg gtc ctg ctg tc                                      | Biocat                                                     |
| mitoFASTK-dRAP             | ATCGATCG ACGCGT atg ctg agg gtc ctg ctg tc                                      | Biocat/For chimeras                                        |
| FASTKD2                    | ATC GAT CGA CGC GTA TGT TGA CAA CTT<br>TGA AGC C                                | Biocat/MRG Colocalization studies                          |
| FASTKD1-YFP                | FASTKD1-YFP Fusion                                                              | Simarro et al., 2010                                       |
| FASTKD4-YFP                | FASTKD4-YFP Fusion                                                              | Simarro et al., 2010                                       |
| px330 CRISPR /CAS9 plasmid | Plasmid for generating KO cell lines                                            | addGene                                                    |
| D1 guide RNA               | CAC CGA TTA ATG AAT GAC GAT ACC C                                               | Clone into px330                                           |
| D4 Guide RNA               | CAC CGT TGG CCG ACT GAG ACT TGC C                                               | Clone into px330                                           |
| FASTKD4 D->A               | GCT GAG GTG CTG CTG GCC AGT GAC GGC<br>GAG TTT C                                | Mutagenesis of FASTKD4                                     |
| D1 $\Delta$ RAP            | CACAGGTGTCGTGACGCGATGGAGGTCAGC<br>GGTGGTGC                                      | Gibson Assembly, Amplify without RAP domain (for Chimeras) |
| D4 $\Delta$ RAP            | CACAGGTGTCGTGACGCGATGGAGGTCAGC<br>GGTGGTG                                       | Gibson Assembly, Amplify without RAP domain (for Chimeras) |
| D1Rap Fw                   | TTGGAATTTTTGGATTCAAAGCACTTTG                                                    | Amplify RAP domain (for Gibson generation of Chimeras)     |
| D4 Rap Fw                  | ttcttgcggtgggagttcccc                                                           | Amplify RAP domain (for Gibson generation of Chimeras)     |
| FASTKRap                   | atcgatcgTCTAGAcgctggcatttctgccggga                                              | Amplify RAP domain (Xbal cut site)                         |
| KMU193                     | CCAAACGCGTGCCACCATGAAAAAACACCT<br>GTTTTCTAG                                     | Fixing of FASTKD1                                          |
| KMU201                     | ATGCTTCTGTAAGTACTAGTGTCTTCAACTAGCGGG<br>TCATGGGCCTCACCAGCAAAGTGTGTGTGA<br>CGTAT | Fixing of FASTKD1                                          |

| Name               | Reverse primer                                                                | cDNA source/Use                                                        |
|--------------------|-------------------------------------------------------------------------------|------------------------------------------------------------------------|
| FASTK isoform 1    | CGA TCG ATT CTA GAG CCC CCT TCA GGC<br>CCC CAG CGC AGG CCC                    | Biocat                                                                 |
| FASTK isoform 4    | CGA TCG ATT CTA GAG CCC CCT TCA GGC<br>CCC CAG CGC AGG CCC                    | Biocat                                                                 |
| mitoFASTK          | CGA TCG ATT CTA GAG CCC CCT TCA GGC<br>CCC CAG CGC AGG CCC                    | Biocat                                                                 |
| mitoFASTK-dRAP     | cga tcg att cta gac acc ctc tgg gca ggg tct                                   | Biocat/For chimeras                                                    |
| FASTKD2            | CGA TCG ATT CTA GAT TGT GTG CTT TGC<br>ACA TTT AC                             | Biocat/MRG Colocalization studies                                      |
| D1 guide RNA       | AAA CGG GTA TCG TCA TTC ATT AAT C                                             | Clone into px330                                                       |
| D4 Guide RNA       | AAA CGG CAA GTC TCA GTC GGC CAA C                                             | Clone into px330                                                       |
| FASTKD4 D->A       | GAA ACT CGC CGT CAC TGG CCA GCA GCA<br>CCT CAG C                              | Mutagenesis of FASTKD4                                                 |
| FASTK $\Delta$ RAP | cgatcgatTCTAGAttcccgcaacaccagcacca                                            | Amplify without RAP domain, XbaI cut site (for generation of Chimeras) |
| D1 $\Delta$ RAP    | ggggaactcccaccgcaagaaAGCAATCCTTTTCAGCC<br>CCTGGT                              | Amplify without RAP domain (for Gibson generation of Chimeras)         |
| D4 $\Delta$ RAP    | CAA AGT GCT TTT GAA TCC AAA AAT TCC<br>AAC GCT AGC CTC TTA GAC CCT GG         | Amplify without RAP domain (for Gibson generation of Chimeras)         |
| D1 Rap Rv          | CAGGTCGACACGCGTGGACAAACATGACTTG<br>ACTTCTCCAAATATACATTC                       | Amplify RAP domain (for generation of Chimeras)                        |
| D4 Rap Rv          | CAAAGTGCTTTTGAATCCAAAAATTCCAACGC<br>TAGCCTCTTAGACCCTGG                        | Amplify RAP domain (for Gibson generation of)                          |
| KMU194             | ATGCTTCTGTAAGTACTAGTGTCTTCAACTAGCGGG<br>TCATGGGCCTCACCAGCAAAGTGTGTGA<br>CGTAT | Fixing of FASTKD1                                                      |
| KMU202             | GAAGCACTAGTTACAGAAGCATGGAGAAGGC<br>TAGAAAGGTTTGTATTTAAACTGCTCTCAGA            | Fixing of FASTKD1                                                      |
